# Supplementary material for: Supramolecular order of stilbenoid dendrons: importance of weak interactions
Source: Royal Society of Chemistry journal article supplement (doi:10.1039/b510713j), 2005-11-08
Supplement: b510713j.pdf [file b510713j.pdf]

## Supplementary Information

### Supramolecular order of stilbenoid dendrons: Importance of weak interactions

Matthias Lehmann,\*<sup>a</sup> Christiane Köhn,<sup>a</sup> Herbert Meier,<sup>b</sup> Sabine Renker,<sup>b</sup> Annette Oehlhof<sup>b</sup>

<sup>a</sup> *Non-Classical Synthetic Methods, Institute of Chemistry, Chemnitz University of Technology, Strasse der Nationen 62, 09111 Chemnitz, Germany. Fax: +49 371 531 1839; Tel: +49 371 531 1205; E-mail: matthias.lehmann@chemie.tu-chemnitz.de*

<sup>b</sup> *Institute of Organic Chemistry, University of Mainz, Duesbergweg 10-14, 55099 Mainz, Germany.*

**Table 1** <sup>1</sup>H NMR data of stilbenoid dendrons **3** (CDCl<sub>3</sub>, TMS as internal standard)

| Compound  | H <sub>ar,center</sub> <sup>a</sup> | H <sub>ar,focal</sub> <sup>a</sup>      | H <sub>ol,focal</sub> <sup>a</sup> | H <sub>ol,inner</sub> <sup>a</sup> | H <sub>ol,outer</sub> <sup>a</sup> |
|-----------|-------------------------------------|-----------------------------------------|------------------------------------|------------------------------------|------------------------------------|
| <b>3a</b> | 7.55 (3H)                           | 6.92 (AA'BB', 2H),<br>7.49 (AA'BB', 2H) | 7.01 (d, 1H),<br>7.15 (d, 1H)      | 7.14 (d, 2H),<br>7.19 (d, 2H)      | 6.96 (d, 2H),<br>7.03 (d, 2H)      |
| <b>3b</b> | 7.54 (2H),<br>7.58 (1H)             | 7.25 (m, 3H),<br>7.62 (m, 1H)           | 7.03 (d, 1H),<br>7.41 (d, 1H)      | 7.16 (d, 2H),<br>7.20 (d, 2H)      | 6.96 (d, 2H),<br>7.03 (d, 2H)      |
| <b>3c</b> | 7.52 (3H)                           | 7.28 (1H), 7.38 (2H),<br>7.55 (2H)      | 7.14 (d, 1H),<br>7.21 (d, 1H)      | 7.14 (d, 2H),<br>7.20 (d, 2H)      | 6.97 (d, 2H),<br>7.03 (d, 2H)      |
| <b>3d</b> | 7.50 (2H),<br>7.56 (1H)             | 7.40 (AA'BB', 2H),<br>7.50 (AA'BB', 2H) | 7.12 (AB, 2H),                     | 7.13 (d, 2H),<br>7.19 (d, 2H)      | 6.96 (d, 2H),<br>7.03 (d, 2H)      |
| <b>3e</b> | 7.54 (2H),<br>7.59 (1H)             | 7.60 (AA'BB', 2H),<br>7.65 (AA'BB', 2H) | 7.16 (d, 1H),<br>7.24 (d, 1H)      | 7.13 (d, 2H),<br>7.19 (d, 2H)      | 6.96 (d, 2H),<br>7.03 (d, 2H)      |
| <b>3f</b> | 7.55 (2H),<br>7.57 (1H)             | 7.60 (AA'BB', 2H),<br>7.82 (AA'BB', 2H) | 7.19 (d, 1H),<br>7.24 (d, 1H)      | 7.13 (d, 2H),<br>7.19 (d, 2H)      | 6.96 (d, 2H),<br>7.03 (d, 2H)      |
| <b>3g</b> | 7.55 (2H),<br>7.57 (1H)             | 7.67 (AA'BB', 2H),<br>7.88 (AA'BB', 2H) | 7.20 (d, 1H),<br>7.28 (d, 1H)      | 7.13 (d, 2H),<br>7.18 (d, 2H)      | 6.96 (d, 2H),<br>7.03 (d, 2H)      |

<sup>a</sup> ar = aromatic protons; ol = olefinic protons; inner, outer = inner and outer olefinic protons of the two long stilbenoid arms.

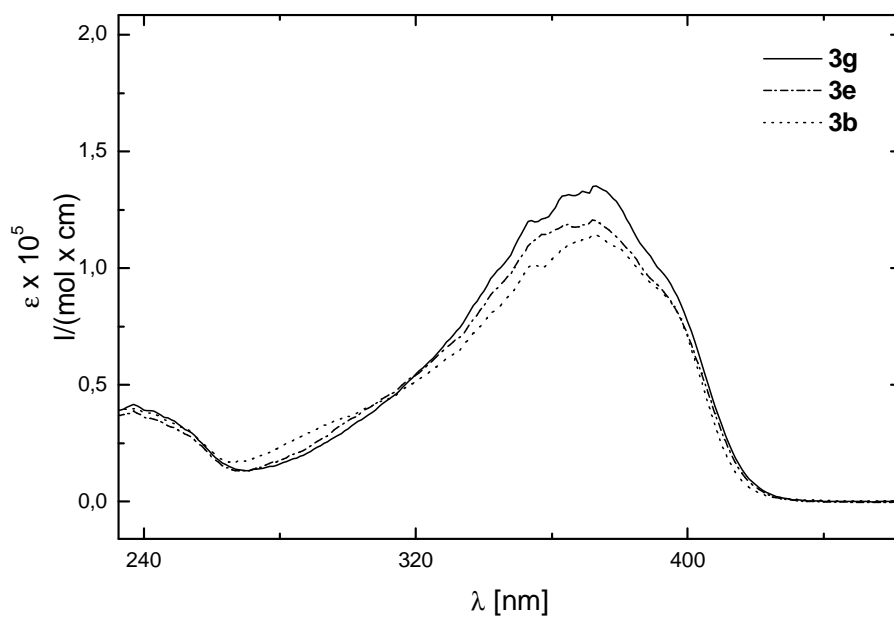

**Fig. 1** UV-Vis spectra of **3b**, **3e** and **3g**, measured in CH<sub>2</sub>Cl<sub>2</sub> solution.

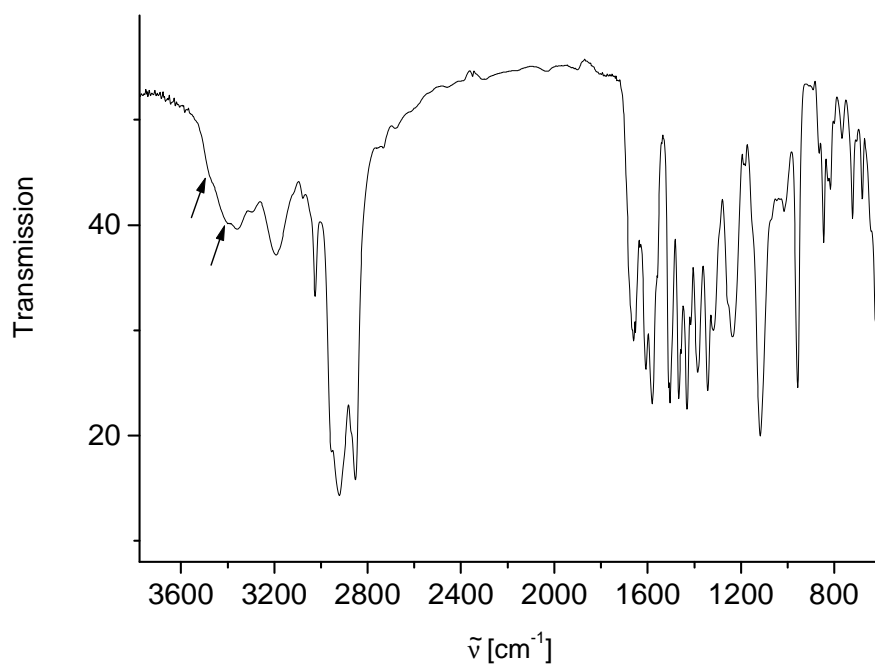

**Fig. 2** FT-IR spectrum of amide **3f** in a thin film at RT. Signals at 3356 and 3196 cm<sup>-1</sup> indicate the H-bonded amides. Shoulders at 3480 and 3400 cm<sup>-1</sup> (arrows) point to the presence of NH functions which are not involved in H-bonds.
